# Supplementary material
Source: Royal Society of Chemistry journal article supplement (doi:10.1039/d6cc01525e)
Supplement: d6cc01525e1.pdf [file d6cc01525e1.pdf]

## **Corrosion-Assisted Heterogeneous Nucleation for CoNiFe Layered Double Hydroxides toward High-Current Methanol Oxidation**

*Ye Li,<sup>a</sup> Yonglin Wang,<sup>a</sup> Xingyu Luo,<sup>b</sup> Hanlu Xie,<sup>a</sup> Yuchen Wei,<sup>a</sup> Yuan Gao,<sup>a</sup> Peng Xiao,<sup>\*b</sup>  
and Yunhuai Zhang<sup>\*a</sup>*

<sup>a</sup> College of Chemistry and Chemical Engineering, Chongqing University, Chongqing, 401331, China.

<sup>b</sup> College of Physics, Chongqing University, Chongqing 401331, China.

\*Corresponding authors E-mail: [zyh2031@cqu.edu.cn](mailto:zyh2031@cqu.edu.cn) (Y. Zhang), [xiaopeng@cqu.edu.cn](mailto:xiaopeng@cqu.edu.cn) (P. Xiao)

# I. Experimental Section

## 1. Materials and Characterizations

**Materials:** Cobaltous(II) nitrate hexahydrate ( $\text{Co}(\text{NO}_3)_2 \cdot 6\text{H}_2\text{O}$ , Macklin, 99%, CAS no. 10026-22-9), iron(II) sulfate ( $\text{FeSO}_4 \cdot 7\text{H}_2\text{O}$ , Aladdin Industrial,  $\geq 99.0\%$ , CAS no. 7782-63-0), ethyl alcohol ( $\text{CH}_3\text{CH}_2\text{OH}$ , KESHI, 99.7%, CAS no. 64-17-5), potassium hydroxide (KOH, Macklin, 95%, CAS no. 1310-58-3), methanol ( $\text{CH}_3\text{OH}$ , MeOH, Macklin, 99.5%, CAS no. 67-56-1), acetone ( $\text{CH}_3\text{COCH}_3$ , CHUANDONG CHEMICAL, 99.5%, CAS no. 67-64-1) and hydrochloric acid (HCl, CHUANDONG CHEMICAL, 36%, CAS no. 7647-01-0) were used without any pre-treatment or purification, deuterium oxide ( $\text{D}_2\text{O}$ , Meryer (Shanghai) Chemical Technology Co., Ltd, 99.9%, CAS no. 7789-20-0), dimethyl sulfoxide (DMSO, Macklin,  $\geq 99.9\%$ , CAS no. 67-68-5).

## 2. Material preparation

**Pretreatment of the nickel foam (NF):** The NF (thickness of 1 mm) was first sonicated in acetone for 15 min, then in  $3 \text{ mol L}^{-1}$  HCl for another 15 min to remove organic residues and surface oxides. Subsequently, it was thoroughly rinsed with distilled water and finally dried in a vacuum oven at  $60 \text{ }^\circ\text{C}$  for 12 h.

**Synthesis of NiFe LDH/NF:** A  $0.085 \text{ M}$   $\text{FeSO}_4 \cdot 7\text{H}_2\text{O}$  aqueous solution was introduced dropwise into anhydrous ethanol at a 1:3 volume ratio under vigorous stirring. A pretreated NF substrate was then fully immersed in the resulting mixture and maintained at  $35 \text{ }^\circ\text{C}$  for 24 h. Afterward, the sample was thoroughly rinsed with deionized water and dried in a vacuum oven at  $60 \text{ }^\circ\text{C}$  for 12 h to yield NiFe LDH/NF (denoted as NiFe), with a catalyst loading of  $\sim 3 \text{ mg cm}^{-2}$ .

**Synthesis of CoNiFe LDH/NF:** For the preparation of CoNiFe LDH, an aqueous solution of  $0.085 \text{ M}$   $\text{FeSO}_4 \cdot 7\text{H}_2\text{O}$  was slowly dripped into a vigorously stirred solution of  $\text{Co}(\text{NO}_3)_2 \cdot 6\text{H}_2\text{O}$  in ethanol at a volume ratio of 1:3. For comparative analysis, the concentration of  $\text{Co}(\text{NO}_3)_2 \cdot 6\text{H}_2\text{O}$  in ethanol was  $0.1 \text{ M}$ ,  $0.2 \text{ M}$  and  $0.3 \text{ M}$  respectively. A piece of pre-treated NF was then completely immersed in the precursor and maintained at  $35 \text{ }^\circ\text{C}$  for 24 h. After washing by deionized water and drying in a vacuum oven at  $60 \text{ }^\circ\text{C}$  for 12 h, CoNiFe LDH was obtained and denoted as CoNiFe-1, CoNiFe-2 and CoNiFe-3 respectively according to the concentration of  $\text{Co}(\text{NO}_3)_2 \cdot 6\text{H}_2\text{O}$  in ethanol. The mass loading of the catalyst on NF was about  $4\sim 6 \text{ mg} \cdot \text{cm}^{-2}$ . To prepare CoNiFe LDH on a  $12 \times 12 \text{ cm}$  piece of NF, the same reagent concentrations and volume ratio as those used for CoNiFe-2 were employed.

### 3. Characterization

The morphology of the catalysts was investigated using a Japan Electron Optics Laboratory (JEOL) JSM-7800F field-emission scanning electron microscope (FE-SEM). Microstructural analysis was performed by transmission electron microscopy (TEM) on a Thermo Fisher Scientific Talos F200S instrument. Site-specific sample preparation was carried out using a Thermo Fisher Scientific Helios 5 CX focused ion beam (FIB) system. Crystalline structure was characterized by X-ray diffraction (XRD) on a PANalytical X'Pert Powder diffractometer using Cu K $\alpha$  radiation ( $\lambda = 1.5406 \text{ \AA}$ ) with a scanning rate of  $2^\circ \text{ min}^{-1}$ . Elemental quantification of Co, Ni and Fe was determined by inductively coupled plasma optical emission spectrometry (ICP-OES) using a Thermo Fisher Scientific ICAP 6300 DUO instrument. Fe K-edge measurement was performed with Si(111) crystal monochromators at the BL14W beamlines at the Shanghai Synchrotron Radiation Facility (SSRF). Before the measurement, powder samples were pressed into thin sheets with 1 cm in diameter and contained in PTFE and sealed using 3M Scotch tape film. Fe-edge extended X-ray absorption fine structure (EXAFS) spectra were recorded in transmission mode. The Fourier transform infrared (FTIR) spectra were obtained on a Thermo Fisher Scientific Nicolet iS50 spectrometer equipped with an ATR accessory, scanning from  $4000$  to  $400 \text{ cm}^{-1}$  with a resolution of  $4 \text{ cm}^{-1}$ . Raman spectra were acquired on a HORIBA Jobin Yvon LabRAM HR Evolution spectrometer equipped with a 532 nm laser. Surface chemical composition was analyzed by X-ray photoelectron spectroscopy (XPS) on a Thermo Scientific Nexsa system. Surface wettability was evaluated through contact angle measurements performed on a DataPhysics OCA 20 system, where both the water droplet contact angle on the catalyst surface and the underwater bubble contact angle were measured. *In situ* attenuated total reflection surface-enhanced infrared absorption spectroscopy (ATR-SEIRAS) was performed using a Bruker INVENIO S FTIR equipped with a liquid-nitrogen-cooled mercury cadmium telluride detector. The working electrode was prepared by drop-casting a slurry of the catalyst powder onto a silicon ATR prism onto which a gold nanofilm had been chemically deposited. A platinum foil and an Hg/HgO electrode (in 1 M KOH) served as the counter electrode and reference electrode, respectively, in a single-compartment electrochemical cell. The spectral resolution was set to  $16 \text{ cm}^{-1}$ , and each spectrum was acquired over approximately 25 s simultaneously with linear sweep voltammetry.

### 4. Electrochemical measurements

All electrochemical measurements were conducted using CHI 660D and CHI 1130D electrochemical workstations (CH Instruments, Inc.) in a standard three-electrode

configuration. The working electrode was CoNiFe LDH/NF with a geometric area of 1 cm<sup>2</sup>, a platinum mesh served as the counter electrode, and a Hg/HgO electrode (in 1 M KOH) was used as the reference electrode. The electrolytes consisted of either 1 M KOH aqueous solution or 1 M KOH with 1 M CH<sub>3</sub>OH. All reported potentials were converted to the reversible hydrogen electrode (RHE) scale according to the equation:<sup>1</sup>

$$E_{\text{RHE}} = E_{\text{Hg/HgO}} + 0.098 + 0.059 \times \text{pH} \quad (1)$$

The distance between the working electrode and the reference electrode was maintained at approximately 2 mm. Linear sweep voltammetry (LSV) was performed at a scan rate of 5 mV s<sup>-1</sup> with no iR compensation. Potentiostatic electrochemical impedance spectroscopy (PEIS) was measured at the potential corresponding to a current density of 10 mA cm<sup>-2</sup> (vs. Hg/HgO), over a frequency range from 100 kHz to 0.01 Hz. The electrochemical active surface area (ECSA) was estimated via cyclic voltammetry (CV) by scanning within a non-Faradaic potential region ( $\pm 0.05$  V around the open circuit potential vs. Hg/HgO) at scan rates of 20, 40, 60, 80, and 100 mV s<sup>-1</sup> to determine the double-layer capacitance ( $C_{\text{dl}}$ ). Subsequently, ECSA is determined as  $\text{ECSA} = AC_{\text{dl}}/C_s$ , where  $A$  is the geometric area of the catalyst and  $C_s$  is the specific capacitance ( $C_s = 0.04$  mF cm<sup>-2</sup>).

Methanol oxidation reaction (MOR) stability was evaluated by chronoamperometry at a fixed potential of 0.45 V vs. Hg/HgO.

## 5. Product quantification

The liquid products from methanol oxidation were analyzed by <sup>1</sup>H and <sup>13</sup>C nuclear magnetic resonance (NMR) spectroscopy on a Bruker AVANCE NEO 400 MHz spectrometer. For NMR sample preparation, 0.5 mL of electrolyte was mixed with 150  $\mu$ L of D<sub>2</sub>O and 0.1 mL of an aqueous internal standard solution containing 0.5  $\mu$ L mL<sup>-1</sup> DMSO. The concentration of electrooxidation products was quantified by comparing the integrated NMR peak areas of the products with that of the internal standard.<sup>2,3</sup>

$$FE(\text{HCOO}^-, \%) = \frac{C_{\text{formate}} \times V_{\text{electrolyte}} \times 4 \times F}{Q} \times 100\% \quad (2)$$

Where  $C_{\text{formate}}$  is the concentration of HCOO<sup>-</sup> (mmol L<sup>-1</sup>) measured from the solution in the battery anode chamber, which is the <sup>1</sup>H NMR data.  $V_{\text{electrolyte}}$  is the volume of the electrolyte (0.07 L), 4 denotes the number of electrons transferred,  $F$  represents the Faraday constant (96,485 C mol<sup>-1</sup>), and  $Q$  is the passed charge (C).

$$FE(\text{H}_2\&\text{O}_2, \%) = \frac{\frac{PV}{RT} \times z \times F}{Q} \times 100\% \quad (3)$$

The Faradaic efficiencies (FE) for hydrogen and oxygen generation were calculated based on the volume of generated gas. In the calculation,  $P$  is the atmospheric pressure during the reaction (kPa),  $V$  is the volume of the collected gas (L),  $R$  is the ideal gas constant (8.314 kPa L mol<sup>-1</sup> K<sup>-1</sup>),  $T$  is the reaction temperature (K),  $z$  is the number of electrons transferred per molecule (for example,  $z = 2$  for H<sub>2</sub> evolution and  $z = 4$  for O<sub>2</sub> evolution),  $F$  is the Faraday constant (96,485 C mol<sup>-1</sup>), and  $Q$  is the total charge passed during electrolysis.

## II. Supplementary Figures and Tables

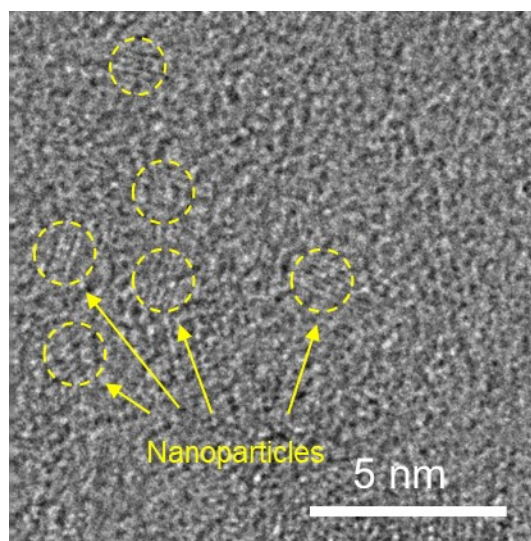

**Figure S1.** HRTEM image of insoluble nanoparticles.

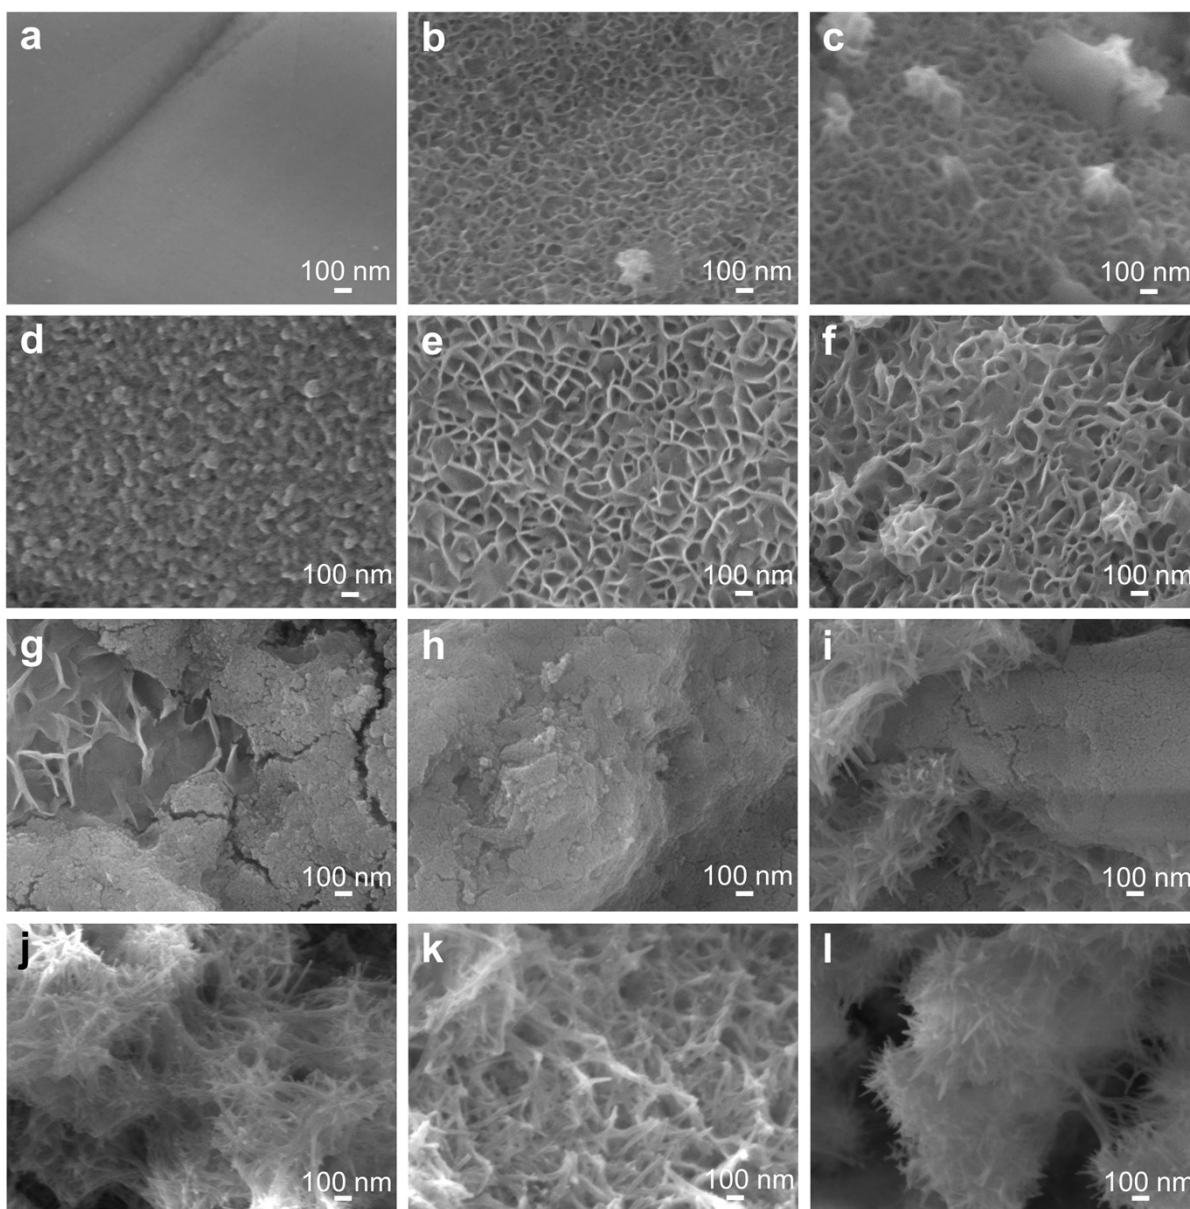

**Figure S2.** SEM images of CoNiFe LDH/NF under different etching durations, (a) 0 min; (b) 1 min; (c) 5 min; (d) 10 min; (e) 30 min; (f) 1 h; (g) 2 h; (h) 4 h; (i) 8 h; (j) 16 h; (k) 24 h; (l) 36 h.

Initially, the NF substrate exhibits a smooth and flat surface (Figure S2a). After 1 min of etching, distinct corrosion pits can be observed, likely due to the oxidation of  $\text{Fe}^{2+}$  to  $\text{Fe}^{3+}$  in the solution under vigorous stirring, which triggers a replacement reaction with the NF, marking the onset of the etching process. After 30 min etching, as shown in Figure S2e, a nanosheet structure begins to grow in situ on the substrate surface, indicating the formation and assembly of the LDH phase. After etching 2 hours, a large number of nanoparticles agglomerate on the surface of the nanosheets (Figure S2g). As the etching time extends to 8 hours, elongated

needle-like structures are observed (Figure S2i). With prolonged etching time, both the density and size of these needle-like structures increase significantly, ultimately forming a composite morphology dominated by a needle-like nanoarray.

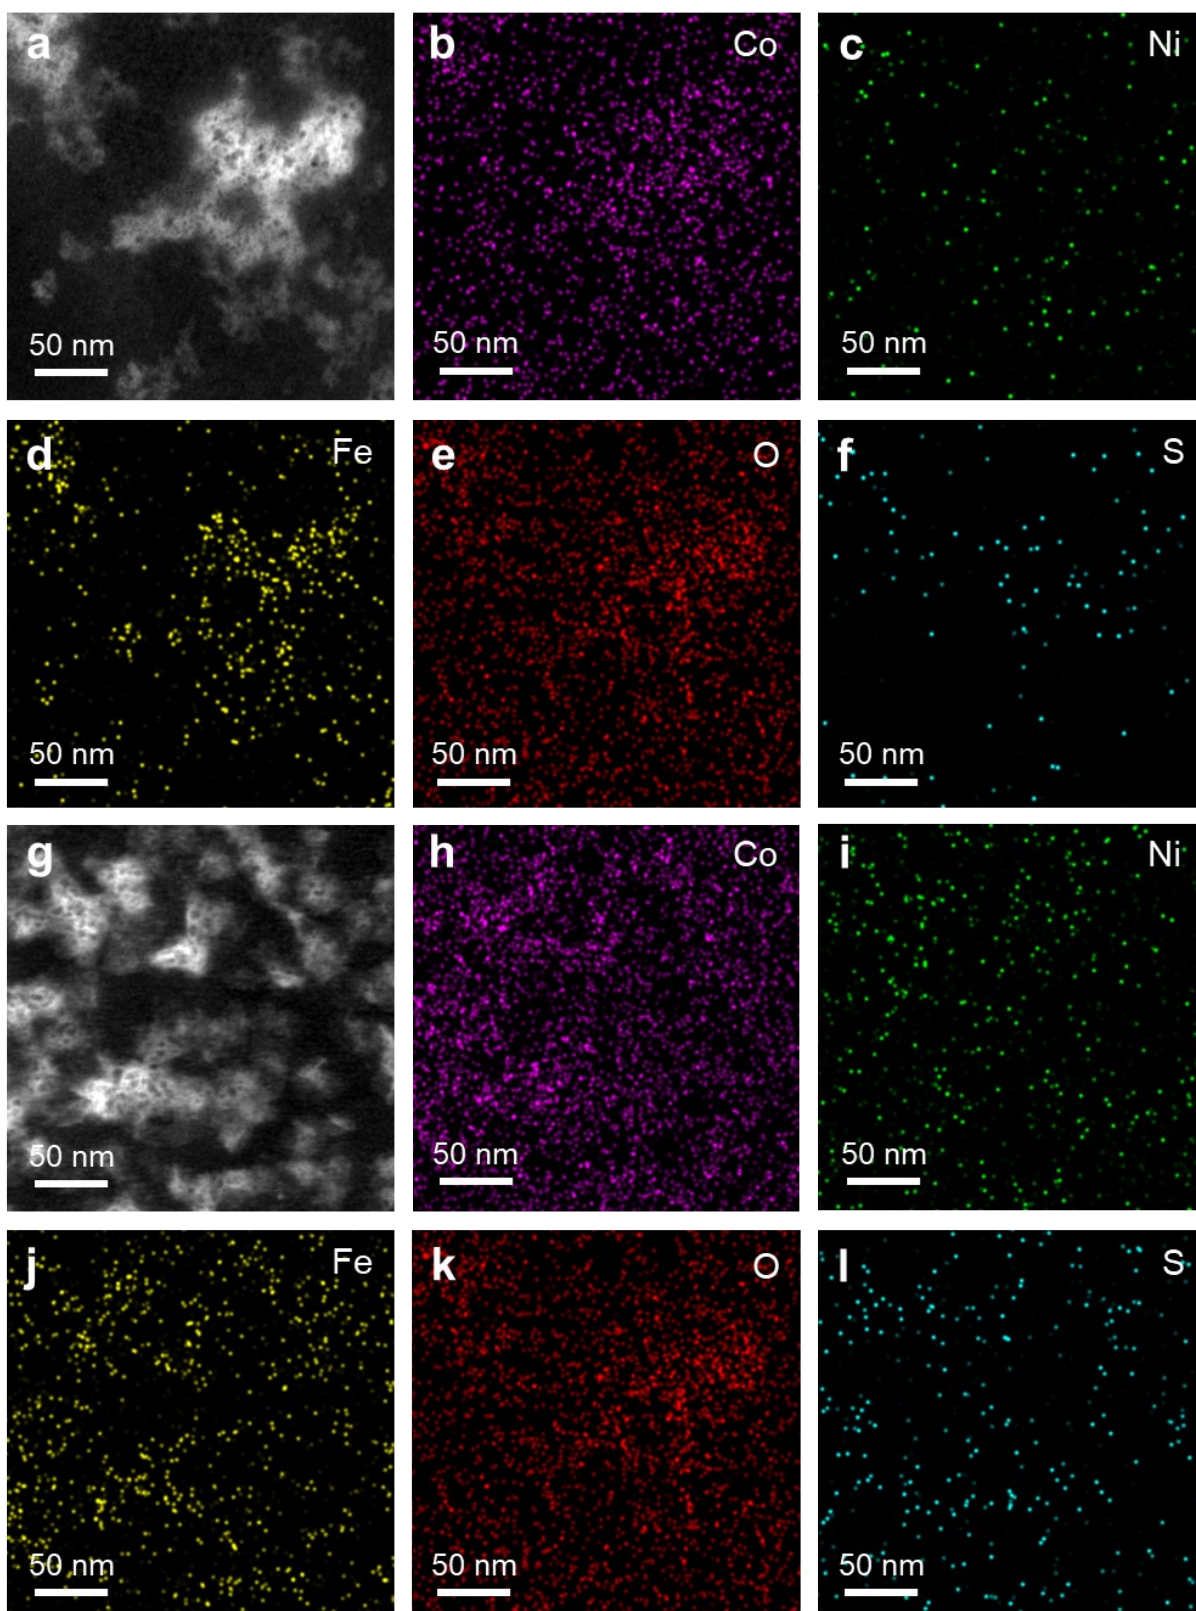

**Figure S3.** (a) HAADF-TEM image of nanoparticles in the heterogeneous solution after etching for 10 min; and (b-f) corresponding EDS mapping images. (g) HAADF-TEM image of nanoparticles in the heterogeneous solution after etching for 4 h; and (h-l) corresponding EDS mapping images.

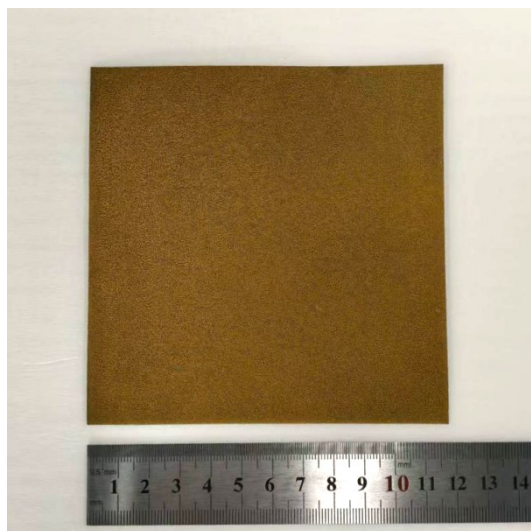

**Figure S4.** Photo of CoNiFe-2 with a size of 12 cm × 12 cm.

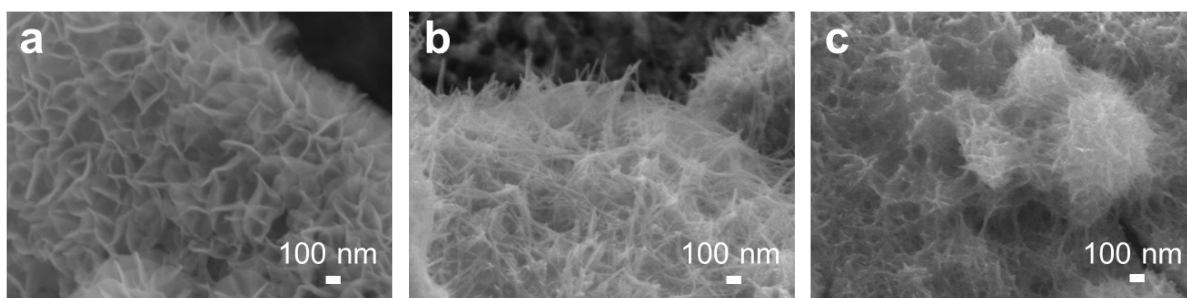

**Figure S5.** SEM image of (a) NiFe; (b) CoNiFe-1 and (c)CoNiFe-3.

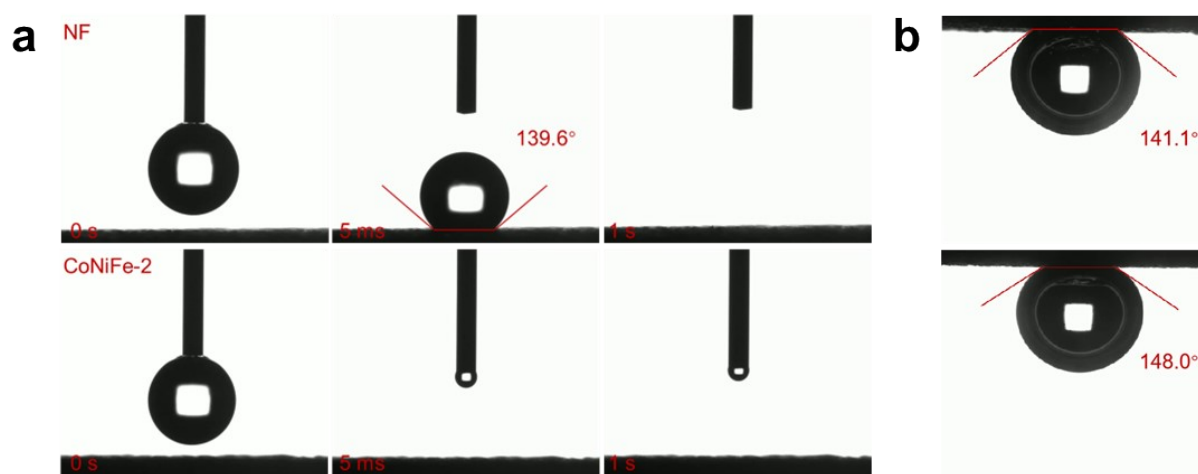

**Figure S6.** The wetting properties of the NF and the CoNiFe-2 electrode. (a) comparison of the hydrophilicity of different materials; (b) comparison of the aerophobicity underwater of different materials.

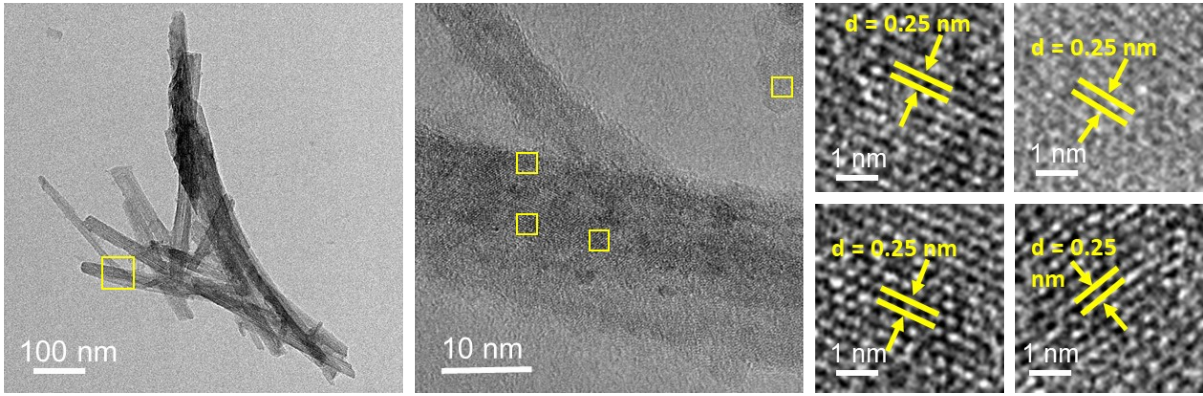

**Figure S7.** TEM image of CoNiFe-2.

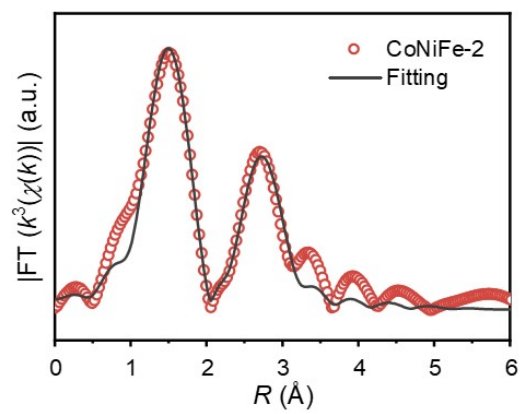

**Figure S8.** FT-EXAFS fitting spectrum of the Fe K-edge for CoNiFe-2.

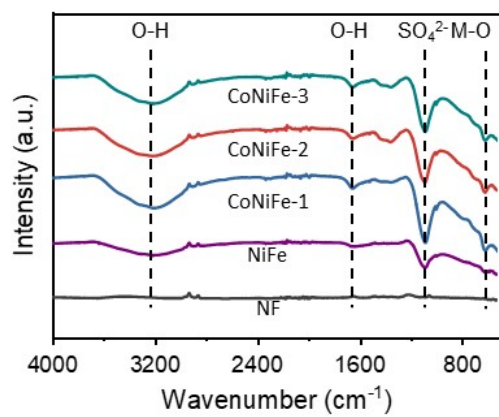

**Figure S9.** FTIR spectra of CoNiFe-3, CoNiFe-2, CoNiFe-1, NiFe and NF.

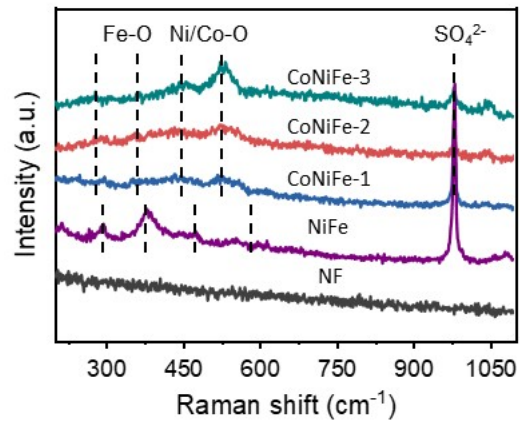

**Figure S10.** Raman spectra of CoNiFe-3, CoNiFe-2, CoNiFe-1, NiFe and NF.

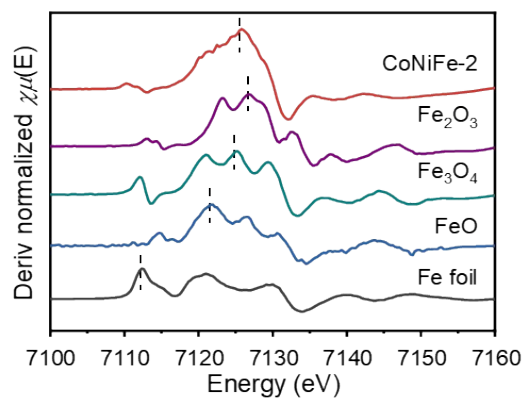

**Figure S11.** First-derivative XANES spectra of Fe foil, FeO, Fe<sub>2</sub>O<sub>3</sub>, Fe<sub>3</sub>O<sub>4</sub> and CoNiFe-2.

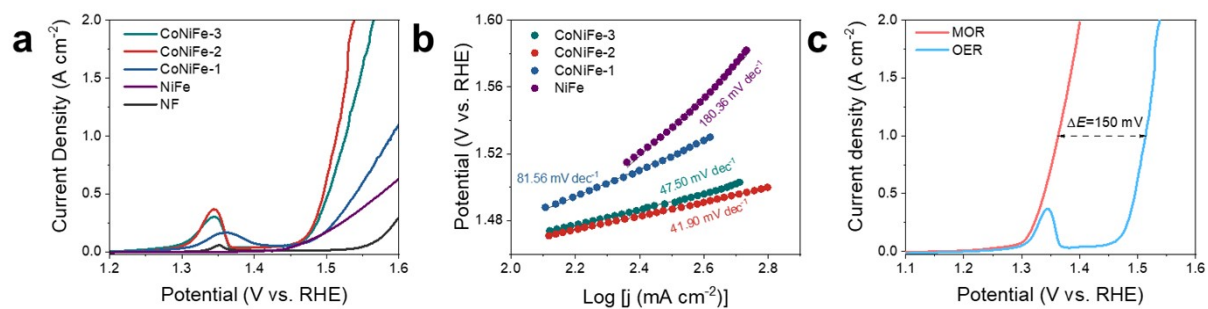

**Figure S12.** (a) LSV polarization curves of NiFe and CoNiFe catalysts in a 1 M KOH solution, and (b) the corresponding Tafel plots for each catalyst. (c) LSV curves of CoNiFe-2 in 1 M KOH with and without addition of 1 M MeOH.

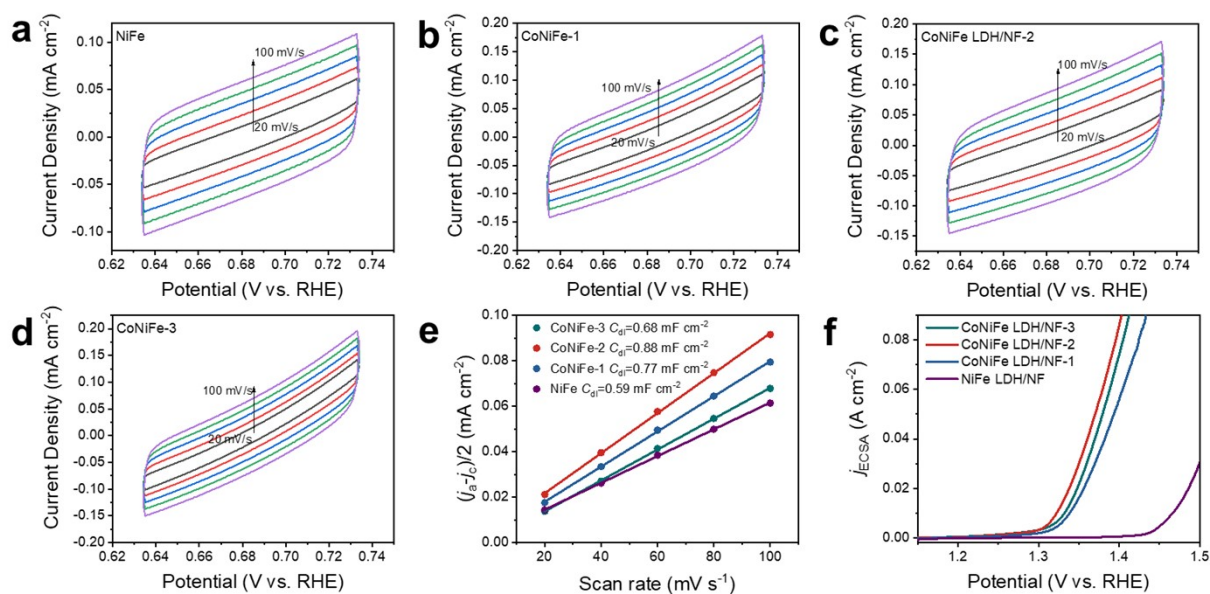

**Figure S13.** CV curves recorded at different scan rates from 20 to 100 mV s<sup>-1</sup> within the non-Faradaic potential range for (a) NiFe, (b) CoNiFe-1, (c) CoNiFe-2 and (d) CoNiFe-3. (e)  $C_{dl}$  value of different materials. (f) LSV curves normalized by the ECSA.

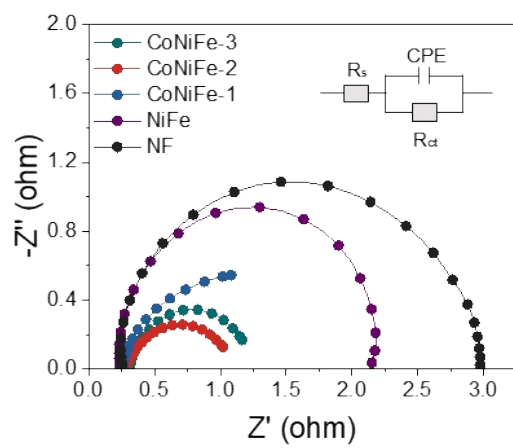

**Figure S14.** EIS data of NiFe and CoNiFe catalysts, and the inset shows the fitting circuit.

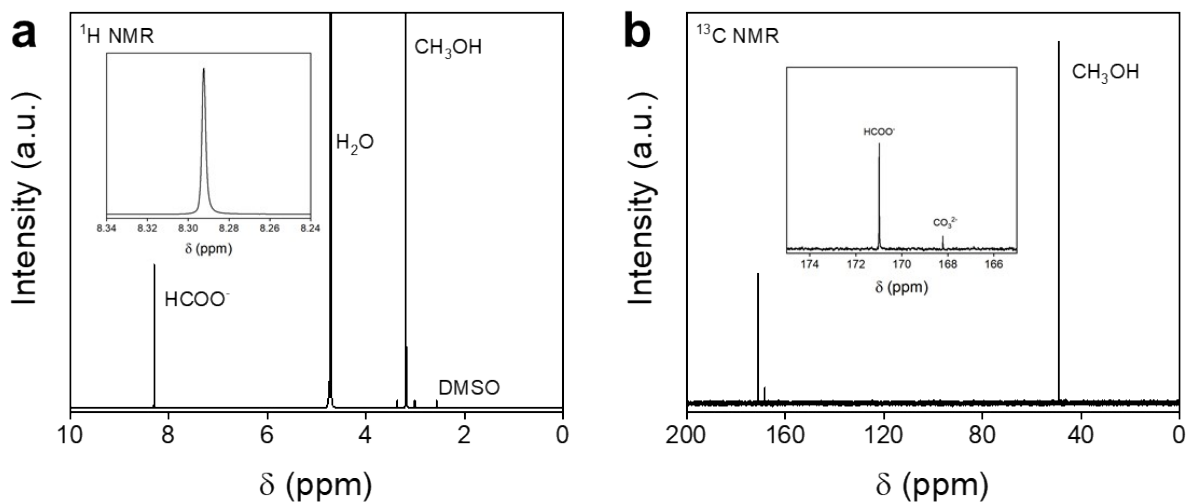

**Figure S15.** (a)  $^1\text{H}$  NMR, (b)  $^{13}\text{C}$  NMR measurements of methanol oxidation to formate on anode at 1.37 V vs. RHE in 1 M KOH + 1M MeOH solution.

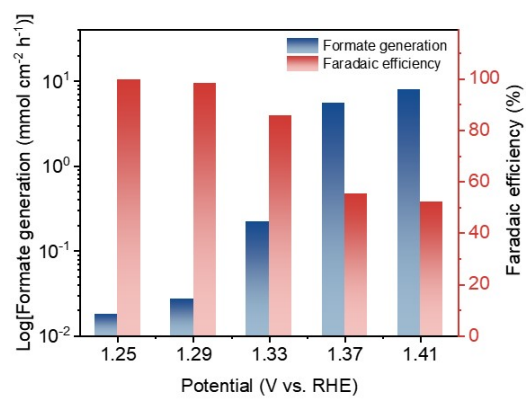

**Figure S16.** The rate of formate production by using CoNiFe-2 catalyst under different voltages in 1M KOH + 1M MeOH solution.

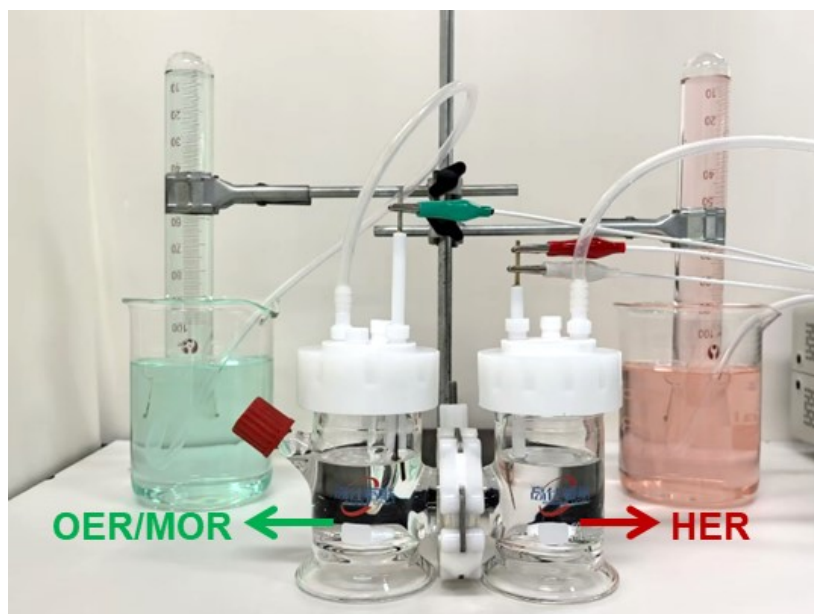

**Figure S17.** Photo of the H-type electrolytic cell used in the full water electrolysis/MOR-assisted hydrogen evolution device.

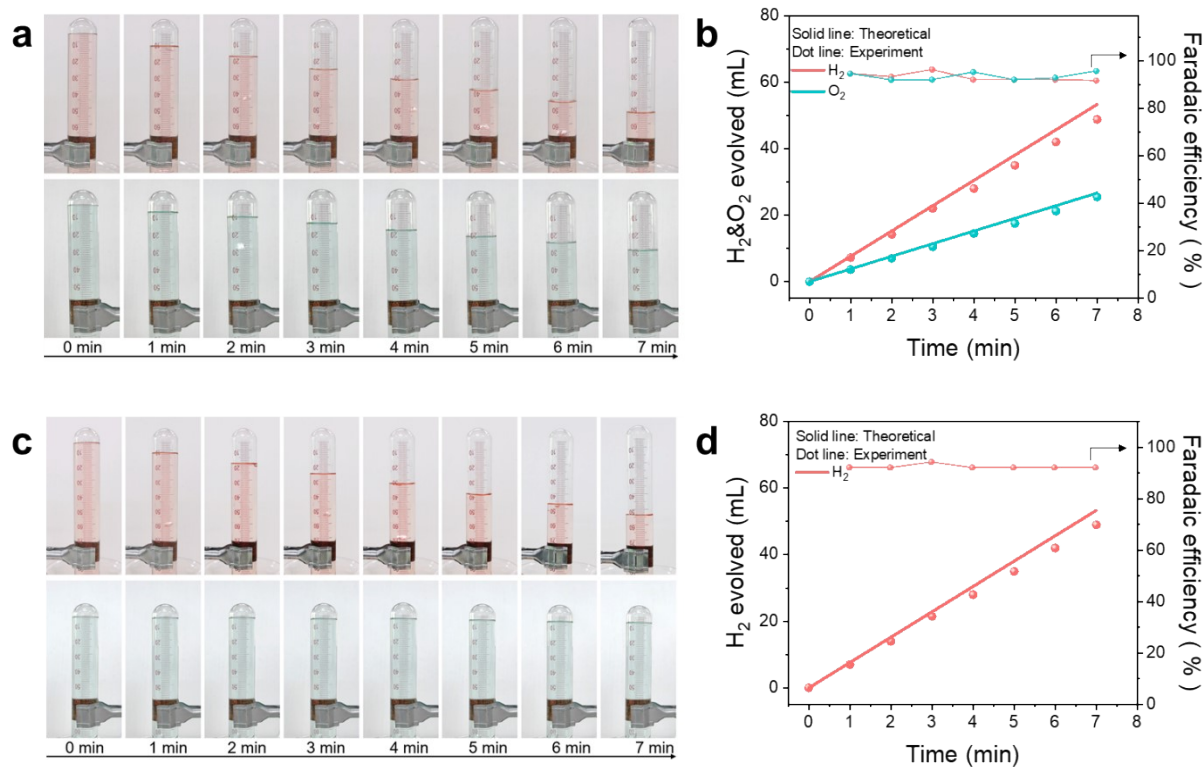

**Figure S18.** (a) Photos of the collected gas and (b) evolved gas volume and Faradaic efficiency for overall water splitting using CoNiFe-2 as the anode. (c) Photos of the collected gas and (d) evolved gas volume and Faradaic efficiency for MOR-assisted H<sub>2</sub> production. The cathodic (red) and anodic (green) products are shown.

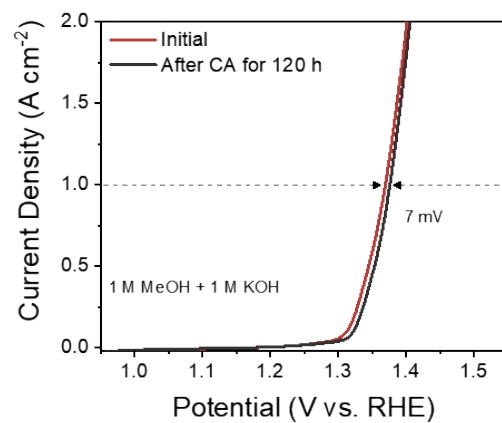

**Figure S19.** LSV curves before and after stability test.

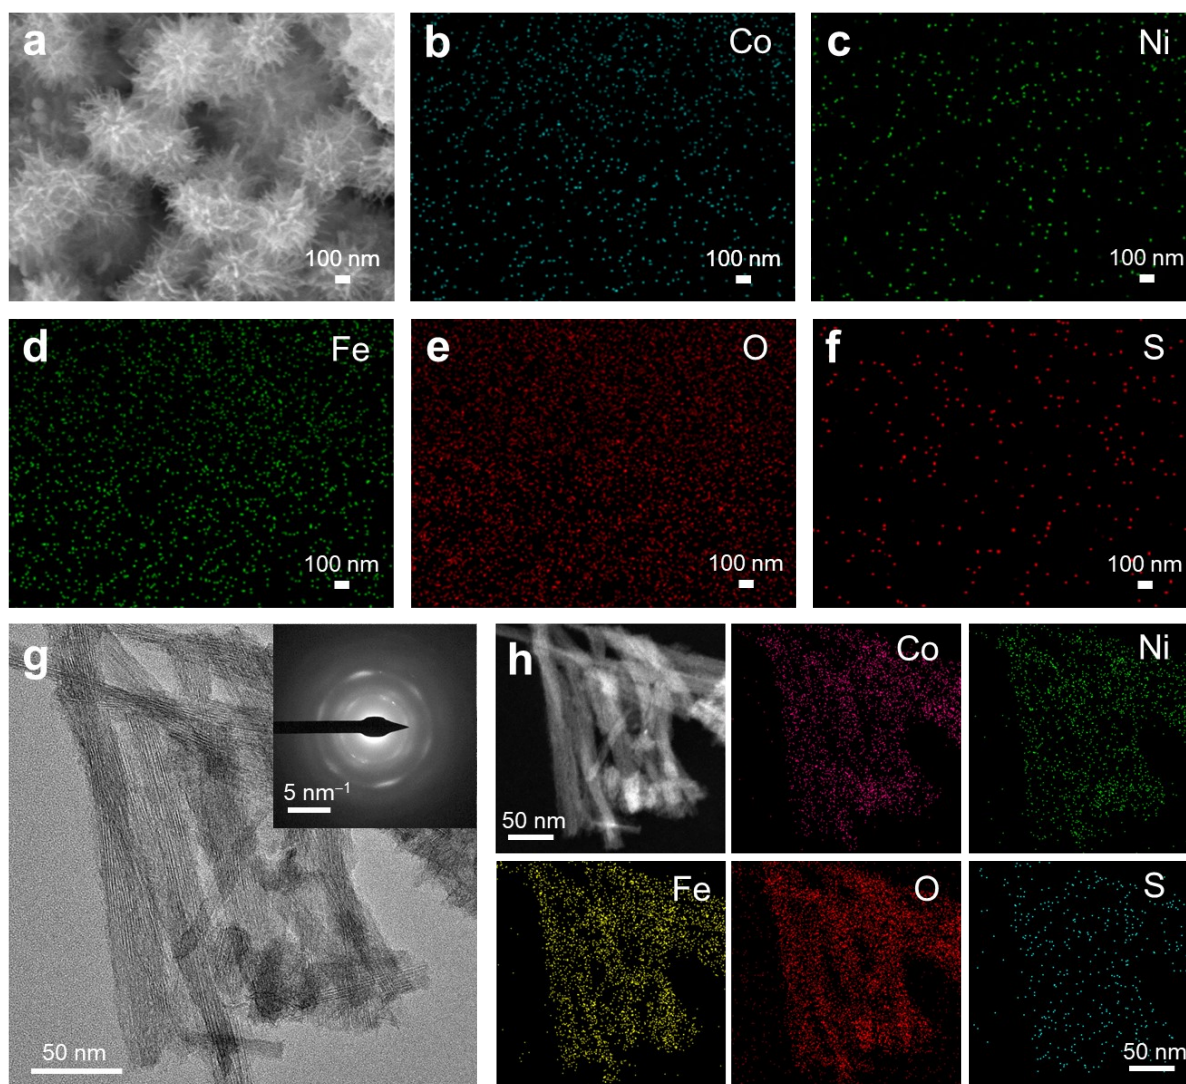

**Figure S20.** (a) SEM image and (b-f) corresponding EDS mapping images of CoNiFe-2 after MOR stability test. (g) TEM image (inset: corresponding SAED pattern), (h) HAADF-STEM image and the corresponding EDS elemental mapping images of CoNiFe-2 catalyst after MOR stability test.

Figure S20 shows that the catalyst largely preserves its original needle-like morphology after prolonged operation, with no obvious signs of morphological transformation or structural collapse. In addition, the corresponding EDS elemental maps reveal that Co, Ni, Fe, O, and S remain homogeneously distributed across the needle-like regions, indicating that the elemental distribution is largely maintained after long-term electrolysis.

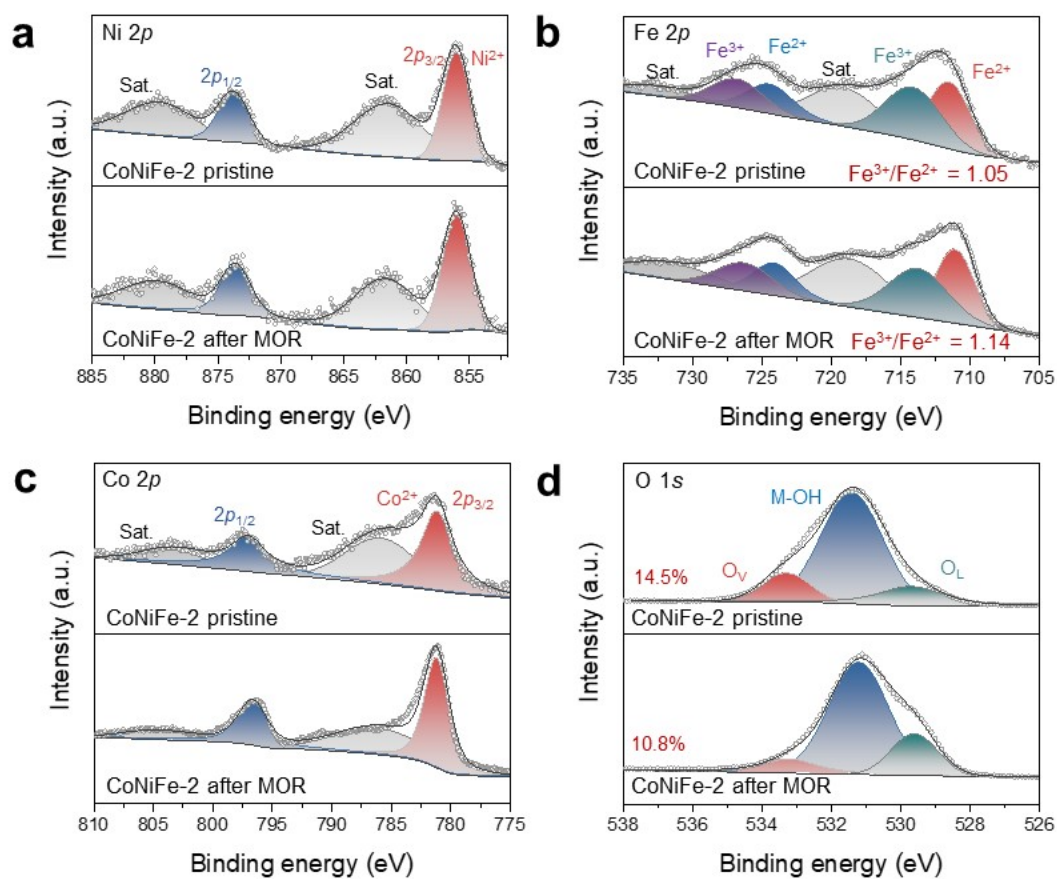

**Figure S21.** Comparison of (a) Ni 2*p*, (b) Fe 2*p*, (c) Co 2*p*, and (d) O 1*s* XPS spectra of CoNiFe-2 catalyst before and after MOR stability test.

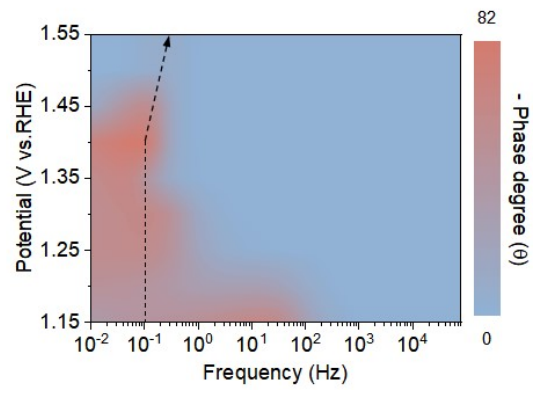

**Figure S22.** Bode plots of CoNiFe-2 for OER at different potentials.

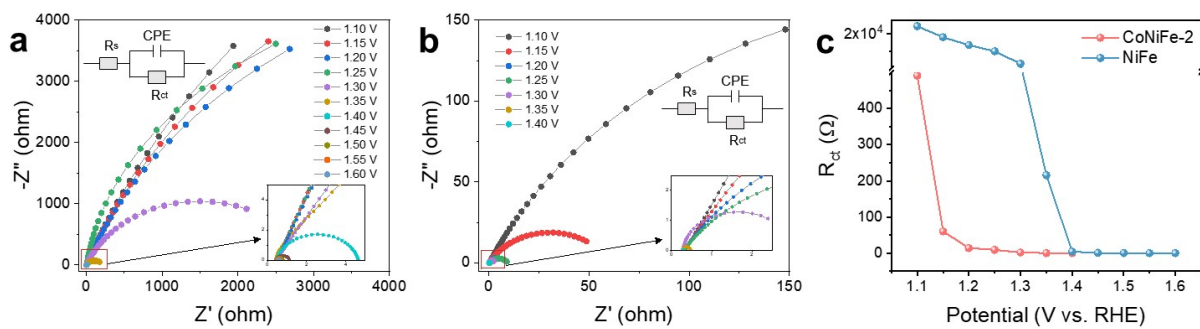

**Figure S23.** Fitted EIS curves at various potentials in 1 M KOH + 1 M MeOH for (a) NiFe and (b) CoNiFe-2. (c)  $R_{ct}$  of NiFe and CoNiFe-2 at different potentials.

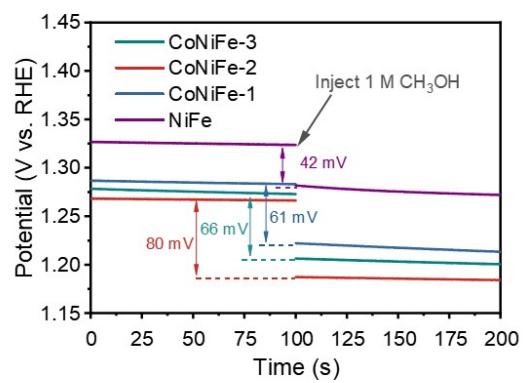

**Figure S24.** OCP of NiFe and CoNiFe catalysts in 1 M KOH before and after injection of MeOH.

**Table S1.** ICP-OES results of NiFe, CoNiFe-1, CoNiFe-2 and CoNiFe-3.

| Catalysts | Co (wt%) | Ni (wt%) | Fe (wt%) |
|-----------|----------|----------|----------|
| NiFe      | -        | 12.07    | 38.04    |
| CoNiFe-1  | 12.24    | 8.55     | 27.82    |
| CoNiFe-2  | 14.94    | 7.39     | 23.89    |
| CoNiFe-3  | 19.97    | 5.81     | 21.60    |

**Table S2.** Structural parameters extracted from EXAFS fitting of the Fe K-edge for CoNiFe-2.

| Path          | CN <sup>a</sup> | R (Å) <sup>b</sup> | $\sigma^2$ (Å <sup>2</sup> ) <sup>c</sup> | $\Delta E_0$ (eV) <sup>d</sup> | R factor |
|---------------|-----------------|--------------------|-------------------------------------------|--------------------------------|----------|
| Fe–O          | 5.85            | 1.98               | 0.0078                                    | 3.23                           | 0.0081   |
| Fe–O–Ni/Fe/Co | 5.52            | 2.90               | 0.0069                                    | 3.80                           |          |

<sup>a</sup>CN, coordination number; <sup>b</sup>R, the distance between absorber and backscatter atoms; <sup>c</sup> $\sigma^2$ , the Debye Waller factor value; <sup>d</sup> $\Delta E_0$ , inner potential correction to account for the difference in the inner potential between the sample and the reference compound; R factor indicates the goodness of the fit.

**Table S3.** Electrochemical properties of CoNiFe, NiFe and NF.

| Catalysts       | $C_{dl}$ (mF cm <sup>-2</sup> ) | ECSAs (cm <sup>2</sup> ) | $R_s$ ( $\Omega$ ) | $R_{ct}$ ( $\Omega$ ) |
|-----------------|---------------------------------|--------------------------|--------------------|-----------------------|
| CoNiFe-3        | 0.68                            | 17.00                    | 0.30               | 0.96                  |
| <b>CoNiFe-2</b> | <b>0.88</b>                     | <b>22.00</b>             | <b>0.28</b>        | <b>0.84</b>           |
| CoNiFe-1        | 0.77                            | 19.25                    | 0.25               | 1.44                  |
| NiFe            | 0.59                            | 14.75                    | 0.23               | 1.93                  |
| NF              | 0.50                            | 12.5                     | 0.24               | 2.63                  |

**Table S4.** The comparison between CoNiFe-2 and other reported non-precious metal-based MOR catalysts.

| Sample                                                      | Electrolyte                  | Performance                                   | Reference                                            |
|-------------------------------------------------------------|------------------------------|-----------------------------------------------|------------------------------------------------------|
| <b>CoNiFe-2</b>                                             | <b>1.0 M KOH+ 1.0 M MeOH</b> | <b>1000 mA cm<sup>-2</sup>/1.37 V vs. RHE</b> | <b>This work</b>                                     |
| MoO <sub>3</sub> /Ni(OH) <sub>2</sub>                       | 1.0 M KOH+ 1.0 M MeOH        | 1000 mA cm <sup>-2</sup> /1.40 V vs. RHE      | <i>J. Am. Chem. Soc.</i> 2023, 145, 49, 26858–26862. |
| CeF <sub>3</sub> @Ni <sub>3</sub> N/CC                      | 1.0 M KOH+ 1.0 M MeOH        | 800 mA cm <sup>-2</sup> /1.45 V vs. RHE       | <i>Angew. Chem. Int. Ed.</i> 2025, 64, e202416763.   |
| NiCo-LDH-E-30/NF                                            | 1.0 M KOH+ 1.0 M MeOH        | 600 mA cm <sup>-2</sup> /1.42 V vs. RHE       | <i>J. Energy Chem.</i> 2023, 85, 267–275.            |
| Fe-NF-500                                                   | 1.0 M KOH+ 1.0 M MeOH        | 650 mA cm <sup>-2</sup> /1.50 V vs. RHE       | <i>Energy Environ. Sci.</i> , 2023, 16, 1100.        |
| Cu <sub>2</sub> O-Cu@Ni <sub>2</sub> P/NF                   | 1.0 M KOH+ 1.0 M MeOH        | 600 mA cm <sup>-2</sup> /1.50 V vs. RHE       | <i>Chem. Eng. J.</i> 2023, 454, 140292.              |
| 20% Ni-N-C                                                  | 1.0 M KOH+ 1.0 M MeOH        | 600 mA cm <sup>-2</sup> /1.53 V vs. RHE       | <i>Chem. Eng. J.</i> 2022, 449, 137888.              |
| NiP <sub>x</sub> -R                                         | 1.0 M KOH+ 1.0 M MeOH        | 400 mA cm <sup>-2</sup> /1.40 V vs. RHE       | <i>Nat. Commun.</i> 2022: 13, 2916.                  |
| Ni-MOFs@350                                                 | 1.0 M KOH+ 1.0 M MeOH        | 400 mA cm <sup>-2</sup> /1.42 V vs. RHE       | <i>ACS Catal.</i> 2023, 13, 3, 2039–2046.            |
| V-HELH                                                      | 1.0 M KOH+ 1.0 M MeOH        | 330 mA cm <sup>-2</sup> /1.41 V vs. RHE       | <i>Small.</i> 2025, 21, 2411550.                     |
| NiFe-LDH/NiFe-HAB/CF                                        | 1.0 M KOH+ 1.0 M MeOH        | 210 mA cm <sup>-2</sup> /1.50 V vs. RHE       | <i>Small.</i> 2023, 19, 2208027.                     |
| F <sub>10</sub> -Ni <sub>3</sub> N                          | 1.0 M KOH+ 1.0 M MeOH        | 300 mA cm <sup>-2</sup> /1.57 V vs. RHE       | <i>Adv. Mater.</i> 2025, 37, 33, 2507573.            |
| Co <sub>3</sub> O <sub>4-x</sub> /NF-P                      | 1.0 M KOH+ 1.0 M MeOH        | 180 mA cm <sup>-2</sup> /1.39 V vs. RHE       | <i>Chem. Eng. J.</i> 2023, 478, 147288.              |
| Ni <sub>0.33</sub> Co <sub>0.67</sub> (OH) <sub>2</sub> /NF | 1.0 M KOH+ 0.5 M MeOH        | 10 mA cm <sup>-2</sup> /1.33 V vs. RHE        | <i>ChemSusChem.</i> 2020, 13, 5, 914-921.            |
| NiFe LDH@SnO <sub>2</sub> /NF                               | 1.0 M KOH+ 0.5 M MeOH        | 10 mA cm <sup>-2</sup> /1.39 V vs. RHE        | <i>J. Mater. Sci. Technol.</i> 2022, 124, 102–108.   |
| Ni-Mo <sub>2</sub> C@C                                      | 1.0 M KOH+ 1.0 M MeOH        | 50 mA cm <sup>-2</sup> /1.43 V vs. RHE        | <i>Angew. Chem. Int. Ed.</i> 2025, 64, e202506215.   |
| Ni-MoN/NF-6                                                 | 1.0 M KOH+ 0.5 M MeOH        | 100 mA cm <sup>-2</sup> /1.48 V vs. RHE       | <i>Small.</i> 2024, 20, 2303300.                     |
| Ni-Bi(OH) <sub>3</sub> /NF                                  | 1.0 M KOH+ 1.0 M MeOH        | 125 mA cm <sup>-2</sup> /1.54 V vs. RHE       | <i>Small.</i> 2024, 20, 2307741.                     |
| NiCo PBA-100                                                | 1.0 M KOH+ 1.0 M MeOH        | 125 mA cm <sup>-2</sup> /1.56 V vs. RHE       | <i>Small.</i> 2024, 20, 2311452.                     |
| Cu/Co NCs                                                   | 1.0 M KOH+ 1.0 M MeOH        | 100 mA cm <sup>-2</sup> /1.58 V vs. RHE       | <i>Adv. Sci.</i> 2025, 12, e05581.                   |

### III. References

1. L. Liu, Y. Chen, Q. Zhang, Z. Liu, K. Yue, Y. Cheng, D. Li, Z. Zhu, J. Li and Y. Wang, *Applied Catalysis B: Environment and Energy*, 2024, **354**, 124140.
2. Y. Hao, D. Yu, S. Zhu, C.-H. Kuo, Y.-M. Chang, L. Wang, H.-Y. Chen, M. Shao and S. Peng, *Energy & Environmental Science*, 2023, **16**, 1100-1110.
3. H. Tian, X. Wang, W. Luo, R. Ma, X. Yu, S. Li, F. Kong, X. Cui and J. Shi, *Chemical Science*, 2024, **15**, 11013-11020.
